# Supplementary material for: Aspartate β-hydroxylase as a target for cancer therapy
Source: PubMed Central journal article supplement (PMC7433162; doi:10.1186/s13046-020-01669-w), 2020-08-18

**Supplementary Figure 1:** Experimental and computationally predicted ASPH substrates. Panel A, Notch signaling proteins; panel B, lipid receptor proteins; panel C, blood coagulation proteins; panel D, thrombospondins; panel E, innate immune system proteins; panel F, fat proteins; panel G, bone related proteins; panel H, seven transmembrane domain containing proteins; panel I, fibrillins and TGF-beta containing proteins; panel J, platelet and EGF proteins; panel K, retina and eye-related proteins; panel L, metastatic breast cancer proteins; panel M, SLIT proteins; panel N, miscellaneous proteins.

**Abbreviations:**

NOTCH1: notch receptor 1; NOTCH2: notch receptor 2; NOTCH3: notch receptor 3; NOTCH4: notch receptor 4; JAG1: jagged canonical Notch ligand 1; JAG2: jagged canonical Notch ligand 2; DLL1: delta like canonical Notch ligand 1; DLL3: delta like canonical Notch ligand 3; DLL4: delta like canonical Notch ligand 4; DNER: delta/notch like EGF repeat containing; DLK1: delta like non-canonical Notch ligand 1; DLK2: delta like non-canonical Notch ligand 2; CRB1: crumbs cell polarity complex component 1; CRB2: crumbs cell polarity complex component 2; LDLR: low density lipoprotein receptor; VLDLR: very low density lipoprotein receptor; LRP1: LDL receptor related protein 1; LRP1B: LDL receptor related protein 1B; LRP2: LDL receptor related protein 2; LRP4: LDL receptor related protein 4; LRP8: LDL receptor related protein 8; FVII: coagulation factor VII; FIX: coagulation factor IX; FX: coagulation factor X; TM: thrombomodulin; PROC: protein C, inactivator of coagulation factors Va and VIIIa; PROZ: protein Z, vitamin K dependent plasma glycoprotein; PROS: protein S; GAS6: growth arrest specific 6; THBS1: thrombospondin 1; THBS2: thrombospondin 2; THBS3: thrombospondin 3; THBS4: thrombospondin 4; CD93: CD93 molecule; MASP1: mannan binding lectin serine peptidase 1; MASP2: mannan binding lectin serine peptidase 2; C1R: complement C1r; C1S: complement C1s; FAT1: FAT atypical cadherin 1; FAT2: FAT atypical cadherin 2; FAT3: FAT atypical cadherin 3; FAT4: FAT atypical cadherin 4; COMP: cartilage oligomeric matrix protein; BMP1: bone morphogenetic protein 1; CELSR1: cadherin EGF LAG seven-pass G-type receptor 1; CELSR2: cadherin EGF LAG seven-pass G-type receptor 2; CELSR3: cadherin EGF LAG seven-pass G-type receptor 3; ADGRE5: adhesion G protein-coupled receptor E5; ADGRL4: adhesion G protein-coupled receptor L4; ADGRE1: adhesion G protein-coupled receptor E1; ADGRE2: adhesion G protein-coupled receptor E2; ADGRE3: adhesion G protein-coupled receptor E3; ADGRE4: adhesion G protein-coupled receptor E4, pseudogene; FBN1: fibrillin 1; FBN2: fibrillin 2; FBN3: fibrillin 3; LTBP1: latent transforming growth factor beta binding protein 1; LTBP2: latent transforming growth factor beta binding protein 2; LTBP3: latent transforming growth factor beta binding protein 3; LTBP4: latent transforming growth factor beta binding protein 4; SCUBE1: signal peptide, CUB domain and EGF like domain containing 1; SCUBE2: signal peptide, CUB domain and EGF like domain containing 2; SCUBE3: signal peptide, CUB domain and EGF like domain containing 3; MMRN1: multimerin 1; EGF: epidermal growth factor; HMCN1: hemicentin 1; HMCN2: hemicentin 2; EYS: eyes shut homolog; SNED1: sushi, nidogen and EGF like domains 1; SVEP1: sushi, von Willebrand factor type A, EGF and pentraxin domain containing 1; SLIT1: slit guidance ligand 1; SLIT2: slit guidance ligand 2; SLIT3: slit guidance ligand 3; FBLN1: fibulin 1; FBLN2: fibulin 2; EFEMP1: EGF containing fibulin extracellular matrix protein 1; EFEMP2: EGF containing fibulin extracellular matrix protein 2; FBLN5: fibulin 5; FBLN7: fibulin 7; VWCE: von Willebrand factor C and EGF domains; MEGF6: multiple EGF like domains 6; AGRN: agrin; NCAN: neurocan; NPNT: nephronectin; EDIL3: EGF like repeats and discoidin domains 3; NELL1: neural EGFL like 1; NELL2: neural EGFL like 2; NRXN1: neurexin 1; HEG1: heart development protein with EGF like domains 1; SUSP1: sushi domain containing 1; CD248: CD248 molecule; TPO: thyroid peroxidase; CRELD1: cysteine rich with EGF like domains 1; MEGF8: multiple EGF like domains 8.

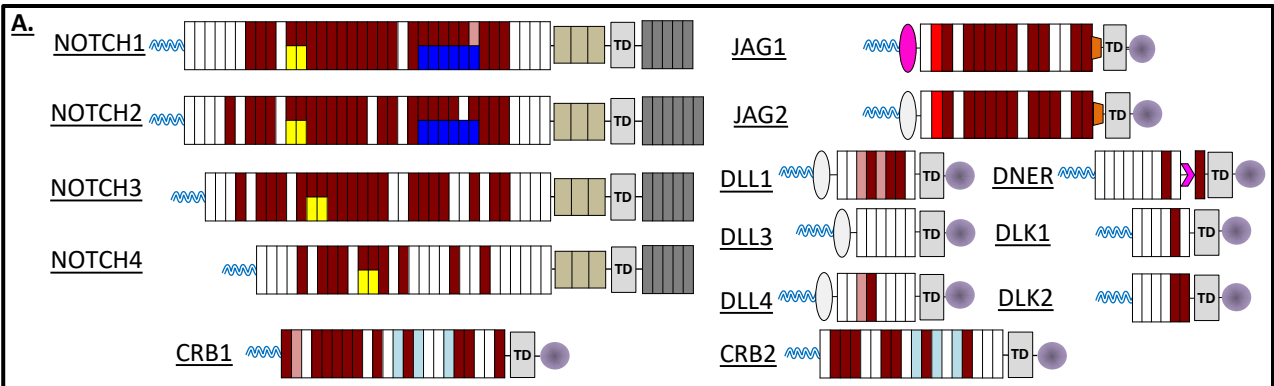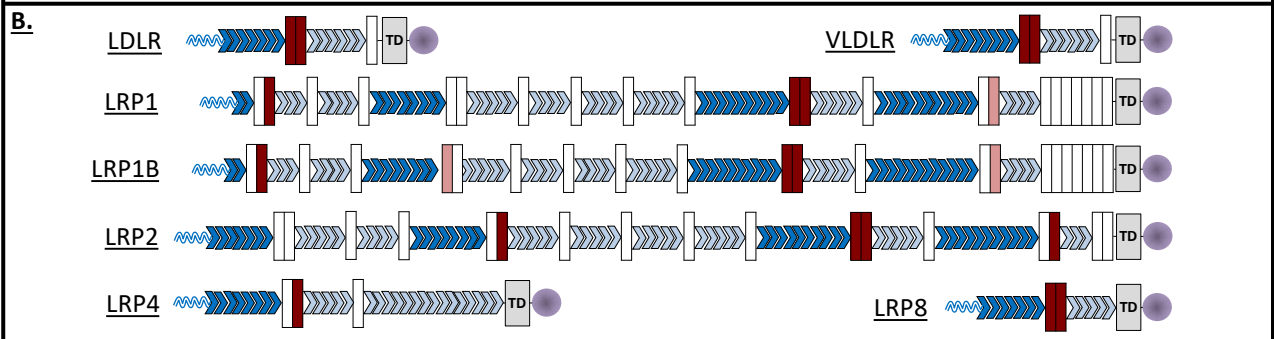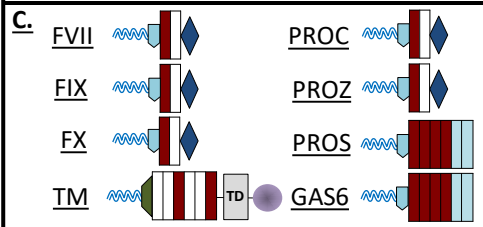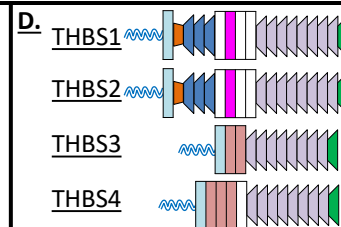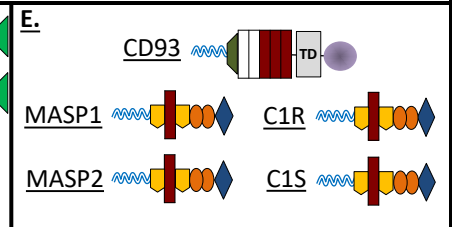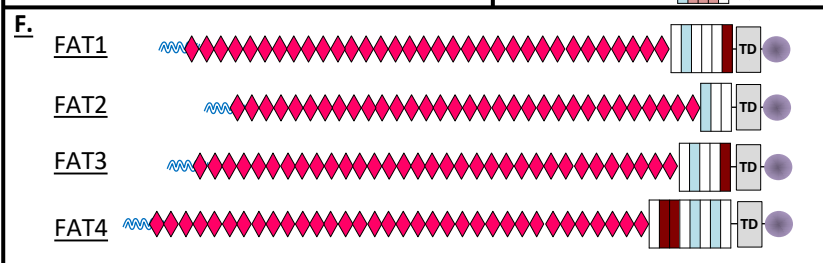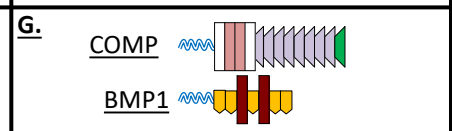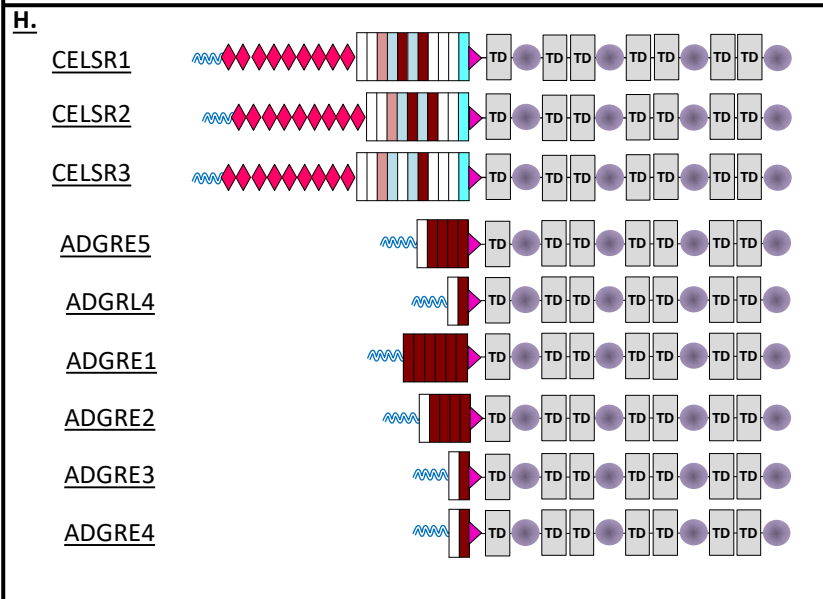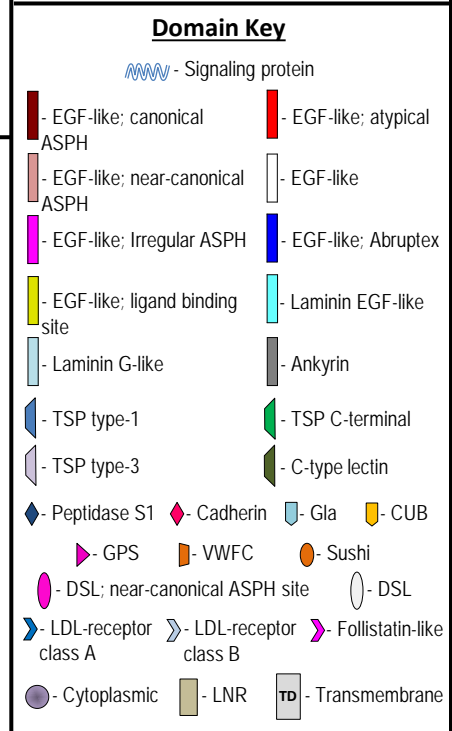

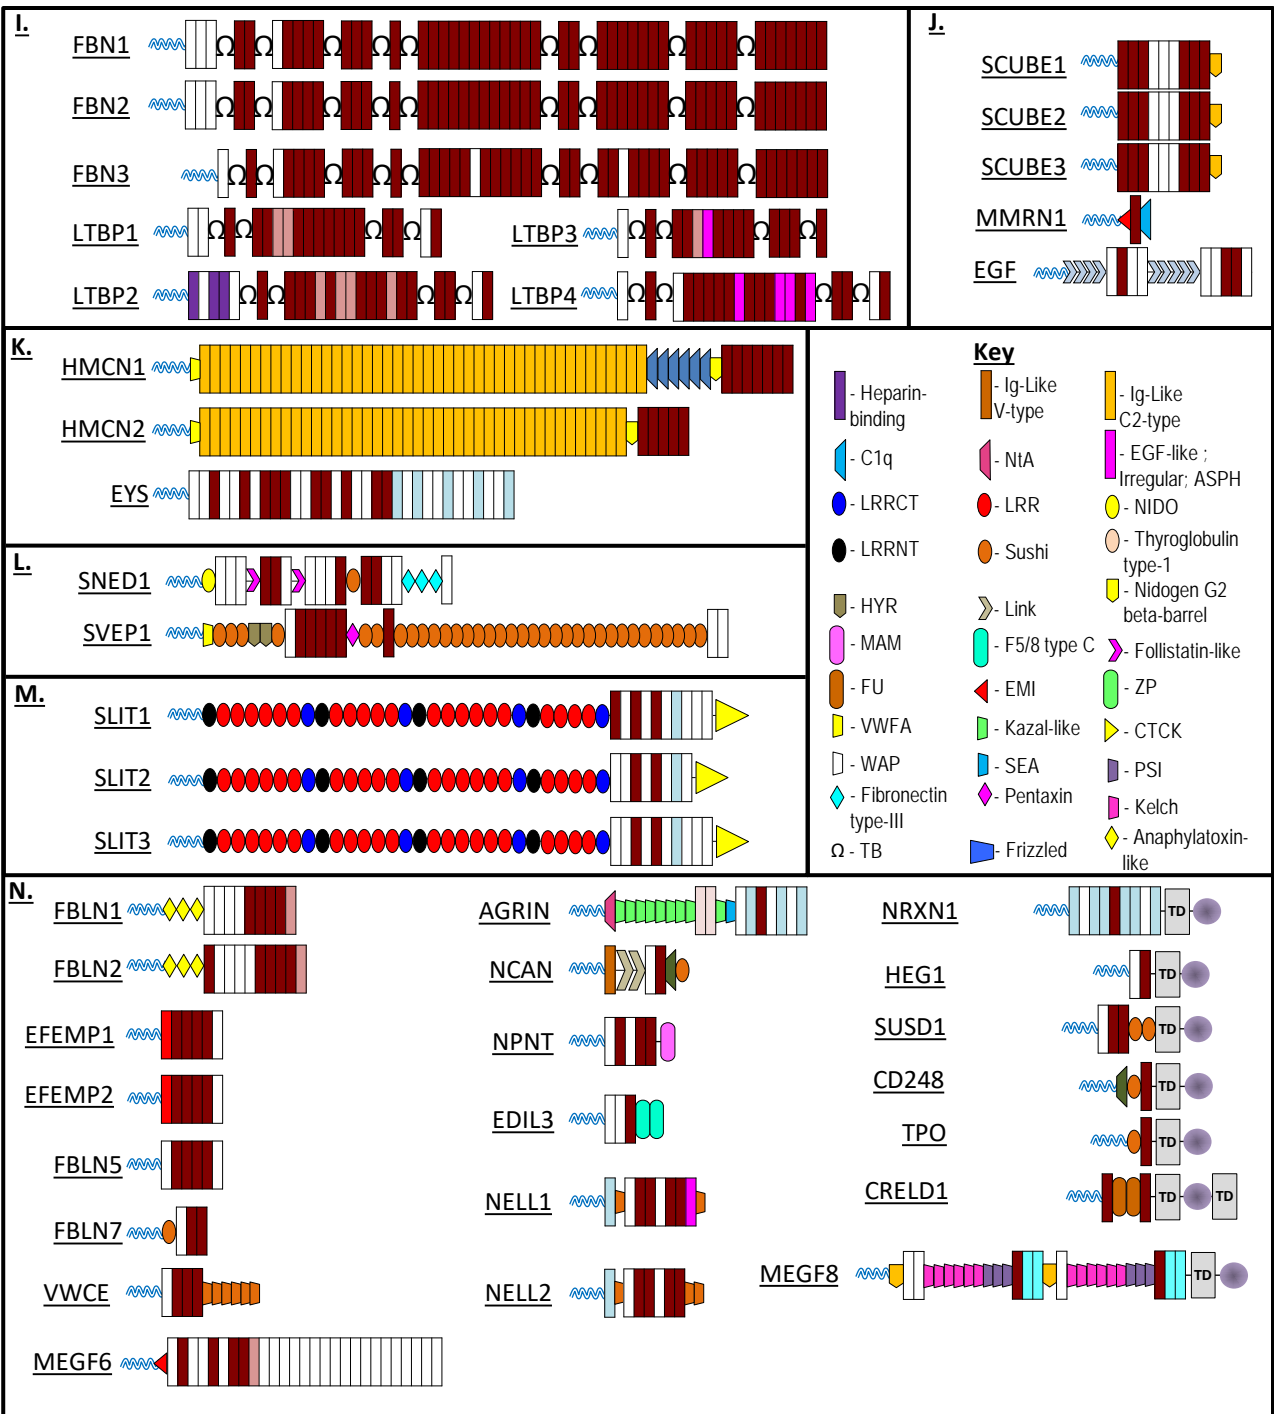

Supplement: 13046_2020_1669_MOESM1_ESM.pdf [file 13046_2020_1669_MOESM1_ESM.pdf]
